# Supplementary material for: Gastric Parietal Cell and Intestinal Goblet Cell Secretion: a Novel Cell-Mediated In Vivo Metal Nanoparticle Metabolic Pathway Enhanced with Diarrhea Via Chinese Herbs
Source: Nanoscale Res Lett. 2019 Mar 5;14:79. doi: 10.1186/s11671-019-2908-z (PMC6401067; doi:10.1186/s11671-019-2908-z)
Supplement: Supplementary file 1 — Figure S1. Characterization of Fe3O4 magnetic nanoparticles by HR-TEM. Figure S2. Characterization of Au clusters by HR-TEM. Scale bar, 5 nm. Figure S3. (A) TEM image of GNRs. Scale bar, 100 nm; (B) absorption spectra of GNRs. Figure S4. Distribution of Au nanoclusters in intestinal tissues. (A) Control groups; (B) ligation groups. Figure S5. Distribution of magnetic nanoparticles in goblet cells of mice with CBD ligation. Figure S6. Distribution of gold nanorods in goblet cells of mice with CBD ligation. Figure S7. Quantitative analysis of nanoparticles in feces based on ICP-MS. (DOCX 2987 kb) [file 11671_2019_2908_MOESM1_ESM.docx]

Supporting information

**Gastric parietal cell and Intestinal goblet cell secretion: a novel cell-mediated *in vivo* metal nanoparticle metabolic pathway enhanced with diarrhea via Chinese Herbs**

Yanlei Liu1, Kunlu Liu2, Meng Yang1, Yue Han1, Qian Zhang1, João Conde3, Yuming Yang1, Gabriel Alfranca1, Yuxia Wang2 , Lijun Ma4,5, Yingge Zhang2, Jie Song1, Yunxiang Pan1, Jian Ni1,5, Daxiang Cui1,5


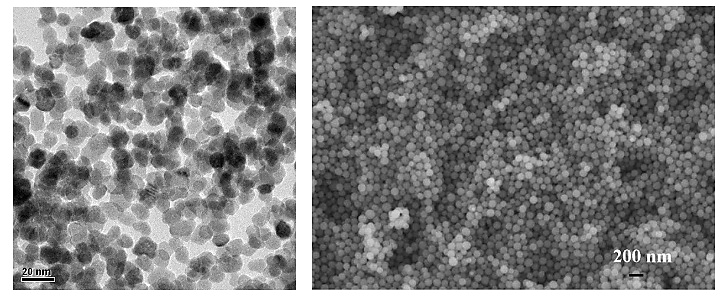
**Figure S1.**Characterization of Fe3O4 magnetic nanoparticles by HR-TEM.


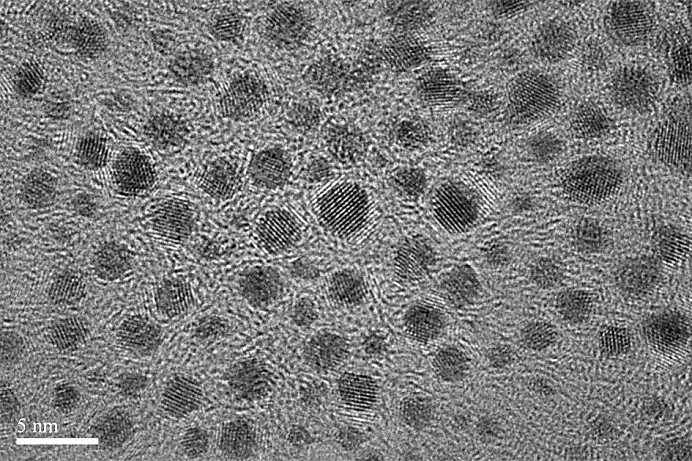


**Figure S2.** Characterization of Au clusters by HR-TEM. Scale bar, 5 nm.


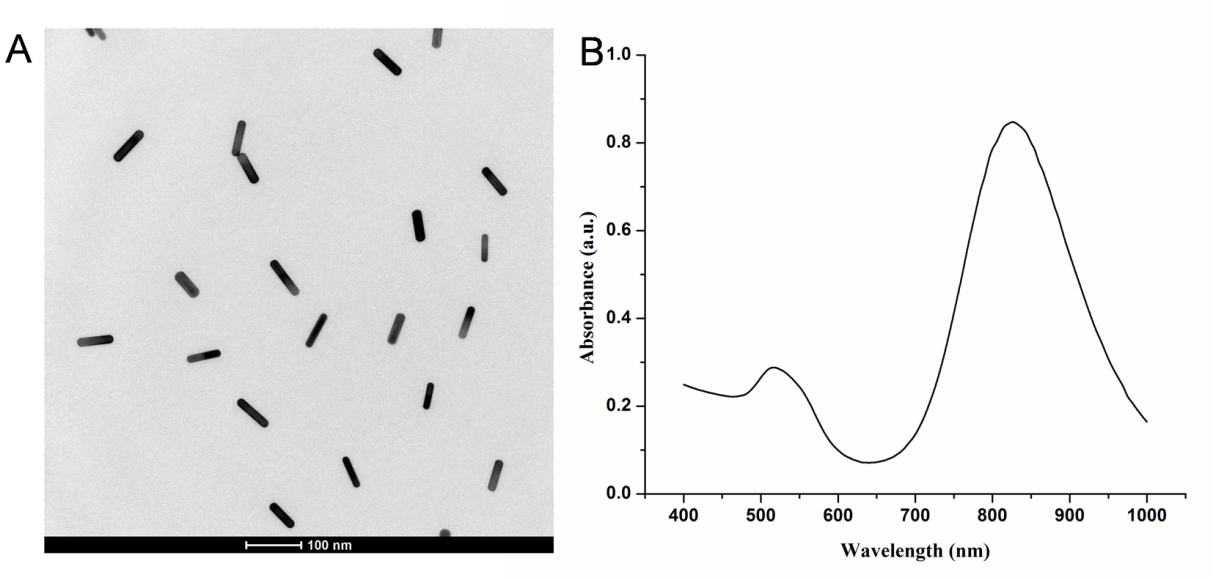


**Figure S3.** (**A**) TEM image of GNRs. Scale bar, 100 nm; (**B**) absorption spectra of GNRs.


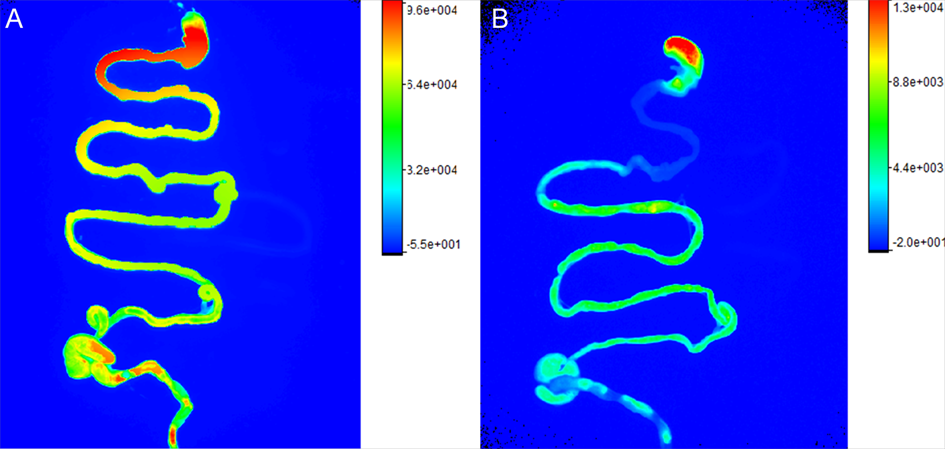


**Figure S4.** Distribution of Au nanoclusters in intestinal tissues. (A) Control groups; (B) Ligation groups.


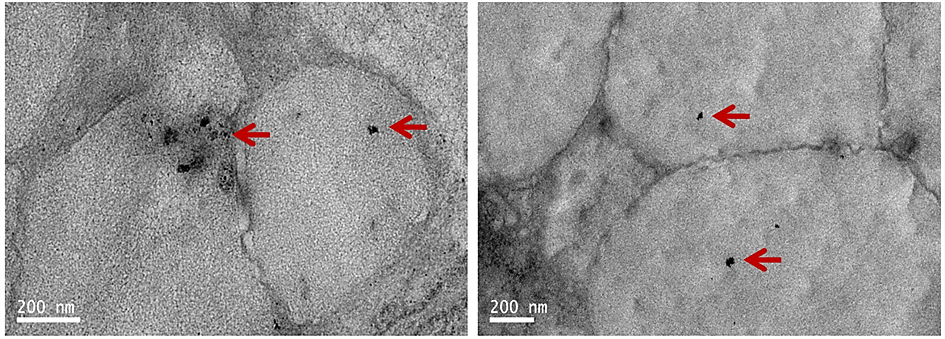


**Figure S5.** Distribution of magnetic nanoparticles in goblet cells of mice with CBD ligation.


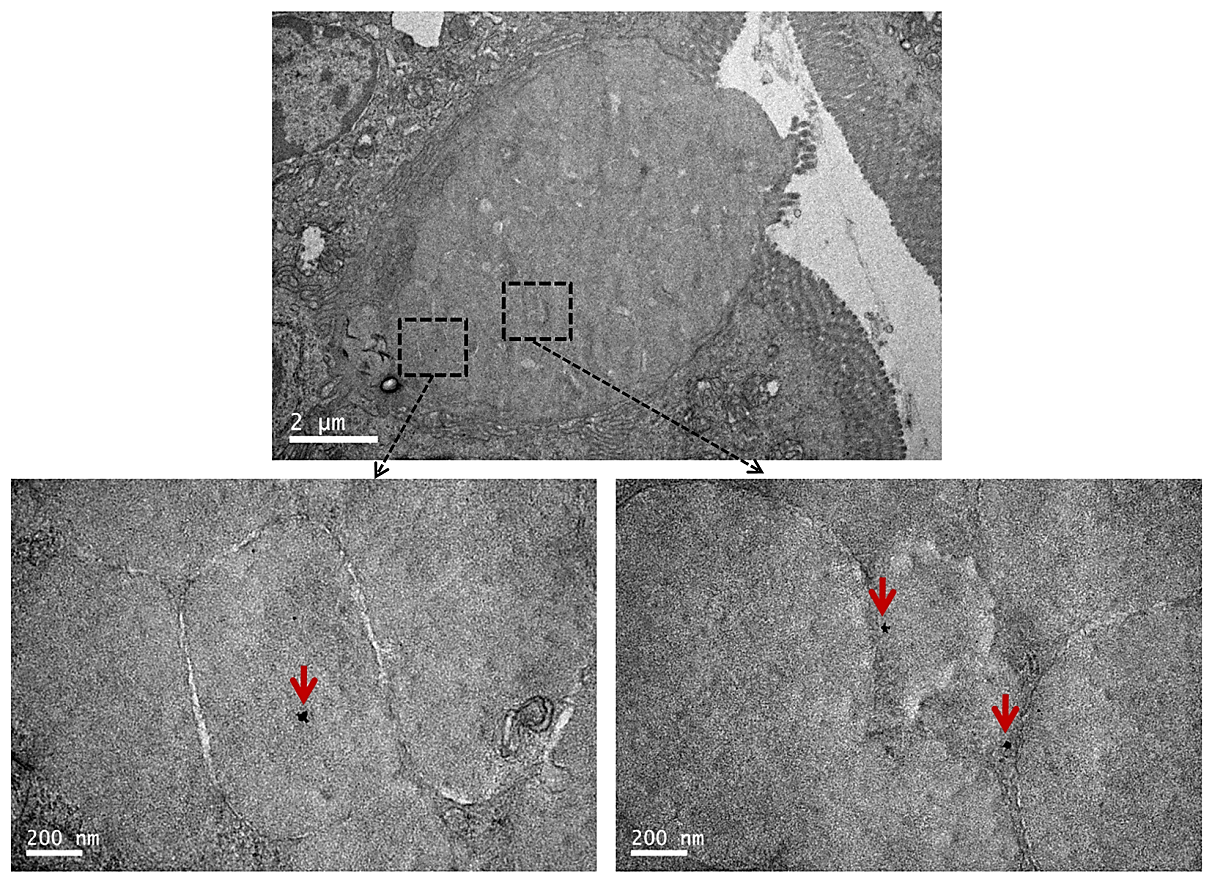


**Figure S6.** Distribution of gold nanorods in goblet cells of mice with CBD ligation.


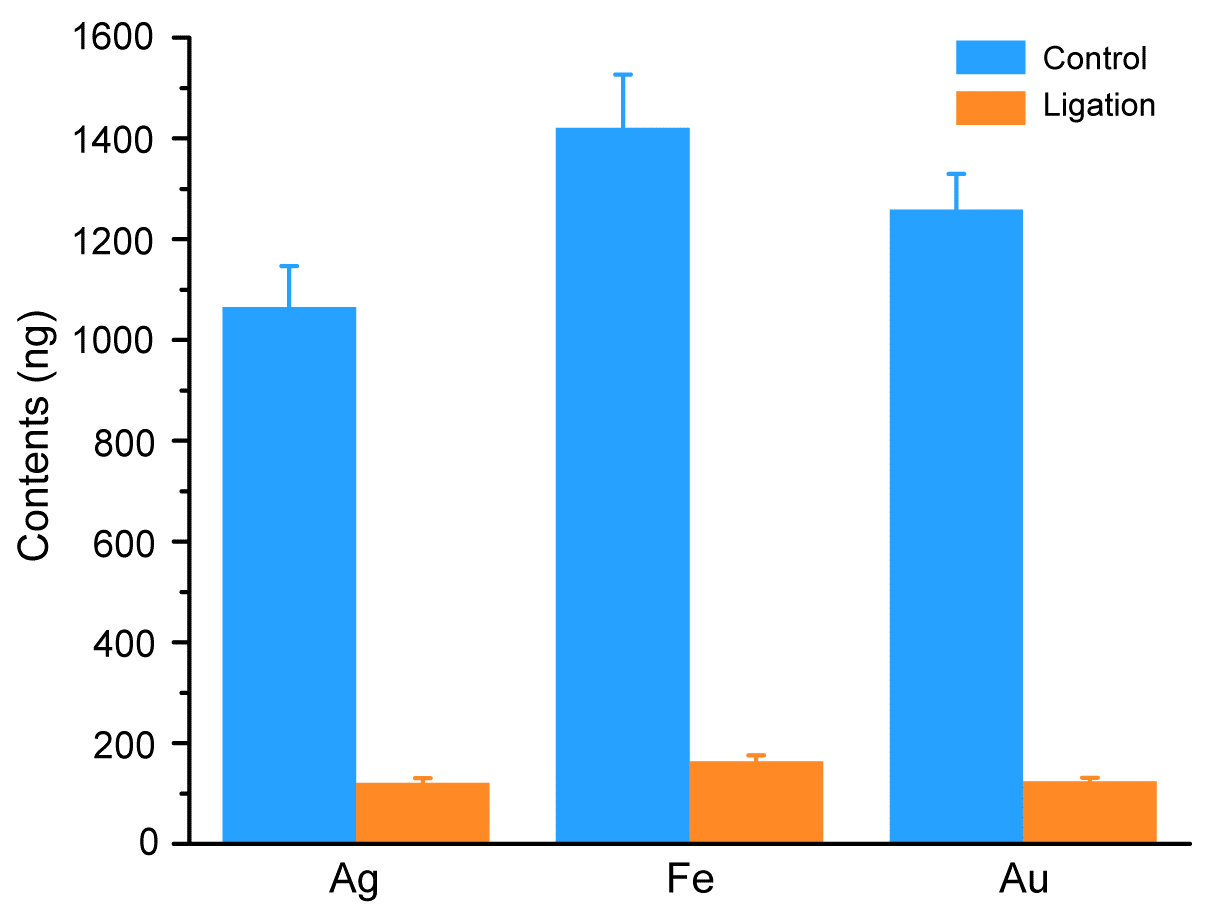


**Figure S7.** Quantitative analysis of nanoparticles in feces based on ICP-MS.
